# Supplementary material
Source: PubMed Central journal article supplement (PMC7837042)
Supplement: mmc1.pdf [file mmc1.pdf]

## MATERIAL SUPLEMENTARIO

Tabla 1. Cálculo HScore (1)

| Variables                                       | Puntuación |
|-------------------------------------------------|------------|
| <b>Temperatura</b>                              |            |
| <38.4°C                                         | 0          |
| 38.4-39.4°C                                     | 33         |
| >39.4°C                                         | 49         |
| <b>Organomegalia</b>                            |            |
| No                                              | 0          |
| Hepatomegalia o esplenomegalia                  | 23         |
| Hepatomegalia y esplenomegalia                  | 38         |
| <b>Número de citopenias</b>                     |            |
| Una línea                                       | 0          |
| Dos líneas                                      | 24         |
| Tres líneas                                     | 34         |
| <b>Triglicéridos (mmol/L)</b>                   |            |
| <1.5                                            | 0          |
| 1.5-4.0                                         | 44         |
| >4.0                                            | 64         |
| <b>Fibrinógeno (g/L)</b>                        |            |
| >2.5                                            | 0          |
| ≤2.5                                            | 30         |
| <b>Ferritina (ng/mL)</b>                        |            |
| <2000                                           | 0          |
| 2000-6000                                       | 35         |
| >6000                                           | 50         |
| <b>GOT (UI/L)</b>                               |            |
| <30                                             | 0          |
| ≥30                                             | 19         |
| <b>Hemofagocitos en aspirado de médula ósea</b> |            |
| No                                              | 0          |
| Sí                                              | 35         |
| <b>Inmunosupresión conocida</b>                 |            |
| No                                              | 0          |
| Sí                                              | 18         |

Una puntuación mayor de 169 tiene una sensibilidad del 93% y una especificidad del 86% para el diagnóstico de linfocitosis hemofagocítica

**Tabla 2.- Indicaciones y contraindicaciones para el uso de Tocilizumab (2).**

| <b>Indicaciones</b>                                                                                                                                                                            | <b>Contraindicaciones</b>                                                        |
|------------------------------------------------------------------------------------------------------------------------------------------------------------------------------------------------|----------------------------------------------------------------------------------|
| Neumonía intersticial con insuficiencia respiratoria grave (score = 2)                                                                                                                         | Valores de GOT/GPT superiores a 5 veces el límite superior de la normalidad      |
| Empeoramiento rápido respiratorio que necesita ventilación no invasiva o invasiva (score $\geq 3$ en la escala COVID respiratory severity scale)                                               | Neutrófilos $< 500$ células/mm <sup>3</sup>                                      |
| Presencia de fallo orgánico extrapulmonar (principalmente shock o score $\geq 3$ en la escala SOFA)                                                                                            | Plaquetas $< 50.000$ células/mm <sup>3</sup>                                     |
| Criterios de Respuesta Inflamatoria Sistémica grave: niveles elevados de IL-6 ( $>40$ pg/ml) (como alternativa elevados niveles de dímero-D ( $> 1500$ ng/ml) o dímero-D en progresivo aumento | Sepsis documentada por otros patógenos que no sean SARS-CoV-2                    |
| Paciente que, de acuerdo con su condición clínica basal, sería subsidiario de ingreso en UCI                                                                                                   | Presencia de comorbilidad que puede llevar según juicio clínico a mal pronóstico |
|                                                                                                                                                                                                | Diverticulitis complicada o perforación intestinal                               |
|                                                                                                                                                                                                | Infección cutánea en curso                                                       |

**Tabla 3.- Criterios propuestos por el Ministerio de Sanidad para el uso de Ruxolitinib (RXT) o Siltuximab (SXT)(2)**

| Situaciones en las que se propone el uso de RXT o SXT                             | No se recomienda el uso de RXT si:                                  | No se recomienda el uso de STX si:                                                                                    |
|-----------------------------------------------------------------------------------|---------------------------------------------------------------------|-----------------------------------------------------------------------------------------------------------------------|
| Neumonía intersticial con insuficiencia respiratoria grave                        | Neutrófilos < 500 células/mm <sup>3</sup>                           | Infección por VIH, Virus Herpes Humano, Virus de Epstein-Barr, tuberculosis u otra infección respiratoria no COVID-19 |
| Empeoramiento rápido respiratorio que necesita ventilación no invasiva o invasiva | Plaquetas < 50.000 células/mm <sup>3</sup>                          | Neutrófilos ≤ 1.0 x 10 <sup>9</sup> /L                                                                                |
| Fallo orgánico extrapulmonar (shock. SOFA >2)                                     | Hemoglobina < 80 g/L                                                | Plaquetas ≤ 50 x 10 <sup>9</sup> /L                                                                                   |
| IL-6 >40 pg/ml, (como alternativa dímero-D > 1500 ng/ml o en progresivo aumento)  | Sepsis documentada por otros patógenos que no sean SARS-CoV-2       | Valor de AST/ALT > a 5 veces el límite superior de la normalidad                                                      |
|                                                                                   | Tratamiento con fluconazol > 200 mg/día                             | Bilirrubina total ≥ 2.0 veces el límite superior de la normalidad                                                     |
|                                                                                   | Embarazo                                                            | Embarazo y lactancia                                                                                                  |
|                                                                                   | Hipersensibilidad al principio activo o a alguno de los excipientes |                                                                                                                       |

**Tabla 4. Resumen de las recomendaciones de las diferentes sociedades y organismos**

|                            | IDSA (3)                                                     | ATS (4)                                               | Ministerio de Sanidad (2)                                                                              | Comisión Nacional de la Salud (China) (5)                        | SSC (6)                        |
|----------------------------|--------------------------------------------------------------|-------------------------------------------------------|--------------------------------------------------------------------------------------------------------|------------------------------------------------------------------|--------------------------------|
| <b>Lopinavir/ritonavir</b> | Recomendado en paciente hospitalizado sólo en contexto de EC | No sugerencia                                         | Disponible                                                                                             | Puede usarse                                                     | En contra (paciente crítico)   |
| <b>Remdesivir</b>          | -                                                            | No sugerencia                                         | No disponible salvo embarazadas o menores graves                                                       | -                                                                | -                              |
| <b>HCO/cloroquina</b>      | Recomendado en paciente hospitalizado en contexto de EC      | Sugerido en neumonía que precisa ingreso hospitalario | Disponible                                                                                             | Puede usarse                                                     | NR                             |
| <b>IFN-β 1B</b>            | -                                                            | -                                                     | No disponible                                                                                          | Puede usarse                                                     | NR                             |
| <b>Corticoides</b>         | En contra                                                    | No sugerencia                                         | -                                                                                                      | Puede usarse si insuf respiratoria e inflamación excesiva        | Sugeridos en shock refractario |
| <b>Corticoides en SDRA</b> | Recomendado en contexto de EC                                |                                                       |                                                                                                        |                                                                  | Uso sugerido                   |
| <b>Tocilizumab</b>         | Recomendado en paciente hospitalizado sólo en contexto de EC | No sugerencia                                         | Disponible para pacientes con insuf resp severa o criterios de respuesta inglaamatoria sistémica grave | Puede usarse si lesiones pulmonares extensas y elevación de IL-6 | NR                             |
| <b>Ruxolitinib</b>         | -                                                            | -                                                     | Disponible para pacientes con insuf resp severa o criterios de respuesta inglaamatoria sistémica grave | -                                                                | -                              |

|                   |                                                         |   |                                                                                                        |                                      |                                 |
|-------------------|---------------------------------------------------------|---|--------------------------------------------------------------------------------------------------------|--------------------------------------|---------------------------------|
| <b>Siltuximab</b> | -                                                       | - | Disponible para pacientes con insuf resp severa o criterios de respuesta inglaamatoria sistémica grave | -                                    | -                               |
| <b>Plasma</b>     | Recomendado en paciente hospitalizado en contexto de EC | - | -                                                                                                      | Paciente crítico o progresión rápida | En contra (en paciente crítico) |

EC: ensayo clínico, NR: no recomendación a favor ni en contra

## **Anexo I. Dosificación de fármacos y otros aspectos importantes a tener en cuenta**

Datos revisados en la página del Ministerio de Sanidad, Consumo y Bienestar Social (2)

### **1. Lopinavir/ritonavir**

Descartar infección por HIV

Dosis de 400 mg/100 mg cada 12 horas, lo que equivale a 2 comprimidos o 5 ml de la solución. Duración máxima de 14 días. Los comprimidos se tienen que tragar enteros. Para la solución oral se ha de contemplar su potencial incompatibilidad con sonda nasogástrica de poliuretano.

### **2. Remdesivir**

Dosis inicial de 200 mg ev el primer día y después 100 mg/24 h ev durante otros 9 días más.

### **3. Hidroxicloroquina**

Dosis de carga de 400 mg/12 horas las 2 primeras dosis y después seguir 200 mg/12 h vía oral. Duración de 5 días, según circunstancias se puede alargar a 10 o 14 días.

### **4. Cloroquina fosfato**

Día 1: Dosis de 620 mg de cloroquina base (4 comprimidos) seguido de una dosis de 310 mg a las 12 h.

Días 2 a 5: 310 mg de cloroquina base cada 12 h

### **5. Interferon-β 1b**

Administración de 250 microgramos por vía subcutánea cada 48 h durante 14 días.

### **6. Corticoides**

Existen distintas pautas en cuanto a dosis y fármaco.

## 7. Tocilizumab

Administración a dosis fijas de acuerdo con el siguiente esquema de tratamiento:

- Pacientes con peso  $\geq 75$  kg: **dosis única** de 600 mg.
- Pacientes con peso  $< 75$  kg: **dosis única** de 400 mg.
- Se puede valorar una segunda infusión a las 12 horas desde la primera infusión en aquellos pacientes que experimenten un repunte de los parámetros analíticos tras una primera respuesta favorable

## 8. Sarilumab

200 o 400 mg iv, dosis única

## 9. Ruxolitinib

5 mg vo, dos veces al día, 14 días

## 10. Siltuximab

11 mg/kg iv durante una hora

## **Bibliografía:**

1. Fardet L, Galicier L, Lambotte O, Marzac C, Aumont C, Chahwan D, et al. Development and validation of the HScore, a score for the diagnosis of reactive hemophagocytic syndrome. *Arthritis & Rheumatology* (Hoboken, NJ). 2014 Sep;66(9):2613–20.
2. Tratamientos disponibles sujetos a condiciones especiales de acceso para el manejo de la infección respiratoria por SARS-CoV-2 [Internet]. Agencia Española de Medicamentos y Productos Sanitarios. [cited 2020 Jun 7]. Available from: <https://www.aemps.gob.es/la-aemps/ultima-informacion-de-la-aemps-acerca-del-covid%e2%80%9119/tratamientos-disponibles-para-el-manejo-de-la-infeccion-respiratoria-por-sars-cov-2/>
3. Bhimraj A, Morgan RL, Hirsch Shumaker A, Lavergne V, Baden L, Cheng VCC, et al. Infectious Diseases Society of America Guidelines on the Treatment and Management of Patients with COVID-19. 2020 Apr 11 [cited 2020 Apr 15]; Available from: <https://www.idsociety.org/practice-guideline/covid-19-guideline-treatment-and-management/>
4. Wilson KC, Chotirmall SH, Bai C, Rello J. COVID-19: Interim Guidance on Management Pending Empirical Evidence. From an American Thoracic Society-led International Task Force. 2020;12.
5. Chinese Clinical Guidance for COVID-19 Pneumonia Diagnosis and Treatment (7th edition) 抗击新冠肺炎 [Internet]. [cited 2020 Apr 10]. Available from: <http://kjfy.meetingchina.org/msite/news/show/cn/3337.html>
6. Alhazzani W, Møller MH, Arabi YM, Loeb M, Gong MN, Fan E, et al. Surviving Sepsis Campaign: guidelines on the management of critically ill adults with Coronavirus Disease 2019 (COVID-19). *Intensive Care Med*. 2020 Mar 28;
